# 1 SUBSURFACE ZIRCONS WITH PRESUMPTIVE “BIOGENIC” INCLUSIONS AS POTENTIALLY USEFUL

## 2 PROXIES FOR STUDYING PRECAMBRIAN BYGONE BIOSPHERES IN GOA

3 Dabolkar Sujata and Kamat Nandkumar\*

4 Department of Botany, Goa University , Taleigao, Goa, 403206 , India

5 \*Corresponding Author: Nandkumar M. Kamat ([nandkamat@gmail.com](mailto:nandkamat@gmail.com))

6 Address: Department of Botany, Goa University , Taleigao, Goa, 403206 , India

7 Phone: +918326519349

8

### 9 Abstract

10 This work was inspired by recent report by Bell et al., 2015 who studied potentially biogenic carbon  
 11 preserved in a 4.1 billion-year-old Zircon and need to assess the potential of Zircons found in Goa.  
 12 Zircons ( $ZrSiO_4$ ) are naturally occurring silicate minerals which show radioactivity and high ductility and  
 13 contain traces of Thorium and Uranium useful in Uranium–Thorium /Thorium -230 dating techniques.  
 14 Zircons can be found in igneous, metamorphic rocks, sedimentary deposits and occurs as a detrital  
 15 minerals in river and beach sands. Previous reports show that the Zircons can occur in different shapes  
 16 such as round, elongated and with surface characteristics (Gartner et al.,2013). U-Pb Zircon dating  
 17 methods had been used to study the continental growth in the western Dharwar craton of southern  
 18 India (Jayananda et al., 2015). The present study was aimed at detection of subsurface Zircons with  
 19 biogenic inclusions and assess their use as proxies for studying bygone Precambrium biospheres in Goa.  
 20 Deep tubewell drilled Cores (60 and 65 m deep from surface) in island of Tiswadi at Taleigao were  
 21 analyzed by light microscopy, Phase contrast microscopy and SEM to detect and classify the Zircons. In

rapid preliminary sampling, total 50 Zircons were identified and 98% indicated the presence of interesting inclusions. These could be bubbles or kerogens or unidentified biological material. Zircons were classified as elongated, slightly rounded with sharp edges and showed widespread variety of surface characteristics like fracturing, cracks, scratches, striations and impact pits which may occur during transport processes. It is suggested that Zircons with presumptive biogenic inclusions can be further studied using techniques such as Raman Spectroscopy, Carbon Isotopic Measurements, X-Ray Microscopy ,Trace Element Measurement consistent with Bell et al., 2015. More exhaustive studies have been undertaken to create a detail image database of Zircons from various other local samples to pinpoint those specifically useful for advanced work based on image analysis of the presumptive bioinclusions. Further attempts would be made to develop specific harvesting techniques to select potentially useful Zircons. International collaborations would be sought for applications of advanced techniques to local Zircons. Such studies would shed light on nature of bygone Precambrian biospheres in Goa and help in understanding evolution of life and the impact of plate tectonics and cataclysmic events shaping life on this planet.

## **Keywords**

**Zircon, Precambrian, Savordem formation , Tilloid samples, Bioinclusions**

## 43 **Introduction**

44 The aim of this study was detection of subsurface Zircons with biogenic inclusions and assess their use  
 45 as proxies for studying bygone Precambrian biospheres in Goa. Zircons has played a prominent and  
 46 complex role in interpreting the composition and history of modern and ancient sediments. Presence of  
 47 carbon in 4.1 billion year zircon was studied by Bell et al., 2015. During this work efforts were made to  
 48 separate, classify and carry out microscopic studies of the Zircons obtained from the deep tubewell  
 49 drilled Cores (60 and 65 m deep from surface) in island of Tiswadi at Taleigao . SEM studies of the  
 50 zircons were carried out. Such studies would shed light on nature of bygone Precambrian biospheres in  
 51 Goa (Fig 2) and help in understanding evolution of life and the impact of plate tectonics and cataclysmic  
 52 events shaping life on this planet.

53

## 54 **Materials and Methods**

### 55 **Regional geologic setting**

56 Goa is situated in the north western part of the metallogenic archean Western Dharwar Craton. The  
 57 Dharwar Craton is divided into Eastern and Western Cratons wherein Goa is situated in the north  
 58 western part of the WDC which includes Sanvordem , Bicholim, and Vagheri Formations (Dessai  
 59 2010).Tiswadi island is a part of Sanvordem formation constituting the metagreywacke with subordinate  
 60 metaconglomerate, lensoid tilloid samples( Dessai 2011).

61 Deep tube well drilled Cores (60 and 65 m deep from surface) in island of Tiswadi at Taleigao  
 62 were obtained from A.G Chachadi, identified as lensoid tilloid (Fig 2). Samples were powdered as shown  
 63 in figure 2a and figure 2b, sieved and subjected to washing. Direct DPX mount, Scanning electron  
 64 microscopy (SEM) and Light and phase contrast microscopic studies were carried out. 24bitmapped

Images processed using SCION software(4.0.2) for following parameters.1.Find edge function output, 2. The density slice function output , and 3. The surface pixel plot density (SPPD).

## Results

Both 60m and 65m deep core samples showed high fraction of Zircons in preliminary sampling. Total 50 zircons were identified and 98% of Zircons indicated the presence of interesting inclusions. The sieving and floatation technique helps in enriching the fractions with zircons, which can be directly observed under light microscopy (fig 3). The captured images of zircons were imported and converted to 24 bitmapped images using SCION image processing software (USA) beta, freeware version 4.0.2 (an image processing and analysis program for the IBM PC) to get distinct image panels for each Zircon with respective DIA output-original image, find edge function (FEF), and surface pixel plot density (SPPD). These panels are shown in Figure 4 and 5. Microscopic techniques helped in the study of presence of presumptive bio inclusions inside the zircon as shown in the figure 6a to 6d.

## Discussion

The results show that using laboratory techniques and advanced image analysis software it is possible to visualize the Zircons and bioinclusions . It is suggested that zircons with presumptive biogenic inclusions can be further studied using techniques such as Raman Spectroscopy, Carbon Isotopic Measurements, X-Ray Microscopy ,Trace Element Measurement consistent with Bell et al ., 2015. More exhaustive studies

have been undertaken to create a detail image database of Zircons from various other local samples to pinpoint those specifically useful for advanced work based on image analysis of the presumptive bioinclusions . Further attempts would be made to develop specific harvesting techniques to select potentially useful Zircons. International collaborations would be sought for applications of advanced techniques to local zircons. Such studies would shed light on nature of bygone Precambrian biospheres in Goa and help in understanding evolution of life and the impact of plate tectonics and cataclysmic events shaping life on this planet(Bell et ., 2015).

## Acknowledgements

We thank Anne Berger, Sales Manager, Digital Surf, France for giving permission to use Mountains Map software, for SEM image processing and analysis. This work was supported by UGC-SAP Phase II – Biodiversity, Bioprospecting programme and Goa University Fungus Culture Collection ( GUFCC). We thank R.N.S Bandekar CO , Vasco da Gama for funding the work on biomineral studies and Professor A.G Chachadi from department of Earth Science for proving core samples.

## References

Bell, E. A., Boehnke, P., Harrison, T. M., & Mao, W. L. (2015). Potentially biogenic carbon preserved in a 4.1 billion-year-old zircon. *Proceedings of the National Academy of Sciences*, 112(47): 14518-14521.

- Cockell, C. S. (2010). Geomicrobiology beyond Earth: microbe–mineral interactions in space exploration and settlement. *Trends in microbiology*, 18(7): 308-314.
- Devaraju, T. C., Sudhakara, T. L., Kaukonen, R. J., Viljoen, R. P., Alapieti, T. T., Ahmed, S. A., & Sivakumar, S. (2010). Petrology and geochemistry of greywackes from Goa-Dharwar sector, western Dharwar Craton: Implications for volcanoclastic origin. *Journal of the Geological Society of India*, 75(3): 465-487.
- Gadd, G. M. (2010). Metals, minerals and microbes: geomicrobiology and bioremediation. *Microbiology*, 156(3): 609-643.
- Gärtner, A., Linnemann, U., Sagawe, A., Hofmann, M., Ullrich, B., & Kleber, A. (2013). Morphology of zircon crystal grains in sediments—characteristics, classifications, definitions Morphologie von Zirkonen in Sedimenten—Merkmale, Klassifikationen, Definitionen.
- Jayananda and Mudlappa, Paleo-to Mesoarchean TTG accretion and continental growth in the western Dharwar craton, Southern India: Constraints from SHRIMP U–Pb zircon geochronology, whole-rock geochemistry and Nd–Sr isotopes. *Precambrian Research* 268 (2015): 295-322.
- Murty, V. G. K., R. Upadhyay, and S. Asokan. Recovery of zircon from Sattankulam deposit in India—Problems and prospects. The 6th International Heavy Minerals Conference “Back to Basics”, the South African Institute of Mining and Metallurgy, South Africa. 2007.
- Thomas, J. B. Melt inclusions in zircon. *Reviews in mineralogy and geochemistry* 53.1 (2003): 63

# **Figure captions**

Figure 1a: Geohydrological setting of tubewells drilled (Chachadi ,2013)

Figure 1b: Geological time scale

Figure 2 (a-b): Lensoid tilloid samples

Figure 2 (c-d): Powdered tilloid samples

- 128     Figure 3: Mixed field showing the Zircon and other minerals
- 129     Figure 4(a-f): original Zircon, 4b- Pseudo, 4c -sharp edges of zircon, 4d-sharp edges of zircons, 4e-density  
 130     slice, 4f -surface plot
- 131     Figure 5(a-e): a-original Zircon, b- sharp edges of zircon, c -Pseudo, d-sharp edges of zircons and e-  
 132     surface plot
- 133     Figure 6 (a-b): Yellow circles indicate presumptive bioinclusions
- 134     Figure 7 (a-b): SEM typology of Zircon

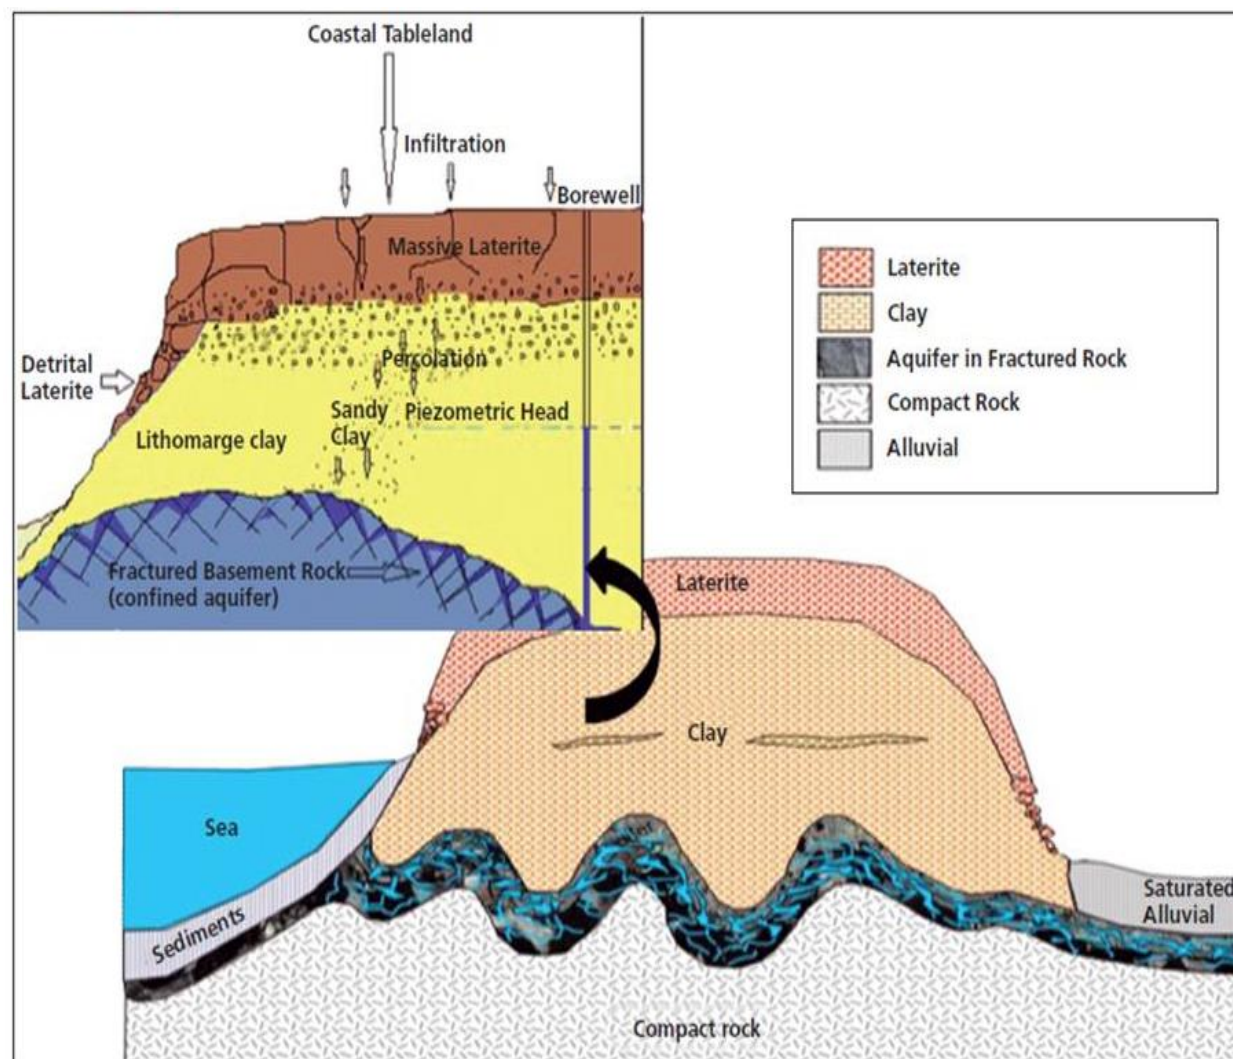

**Fig1a: Geohydrological setting of tubewells drilled (Chachadi )**



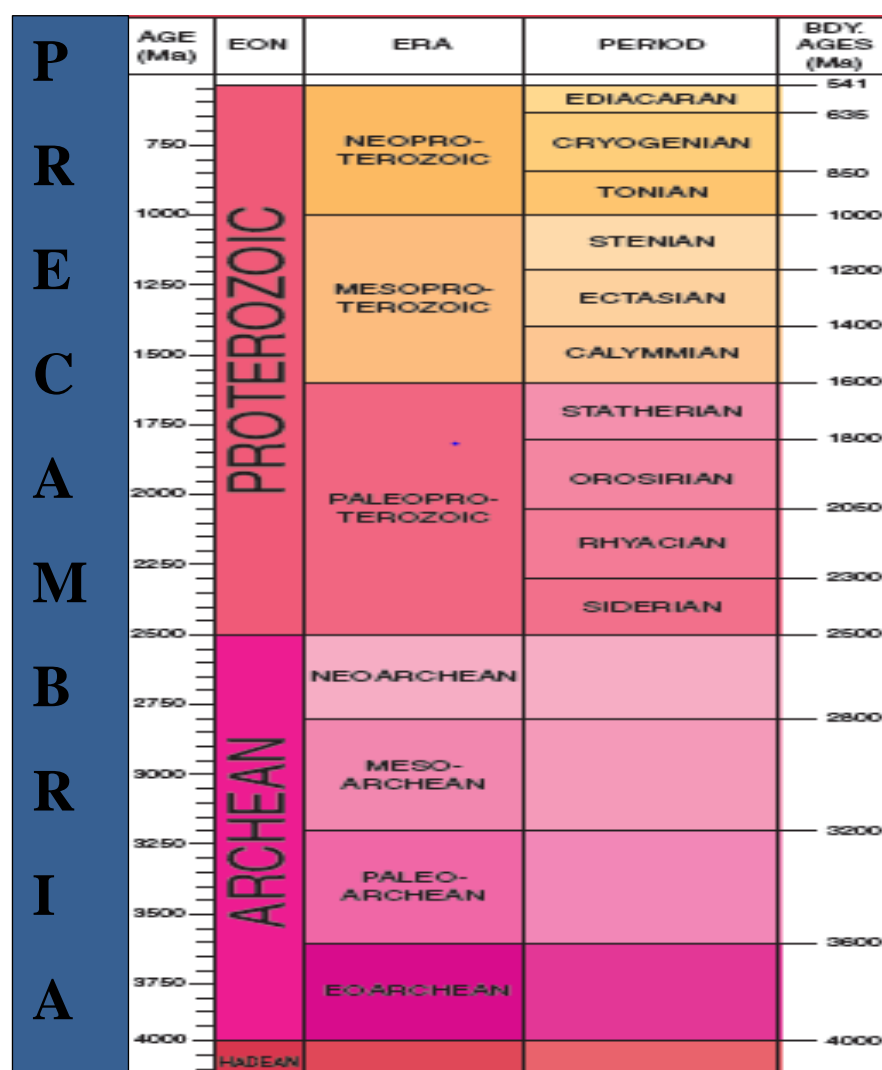

Fig 1b: Geological time scale –Geological survey of America

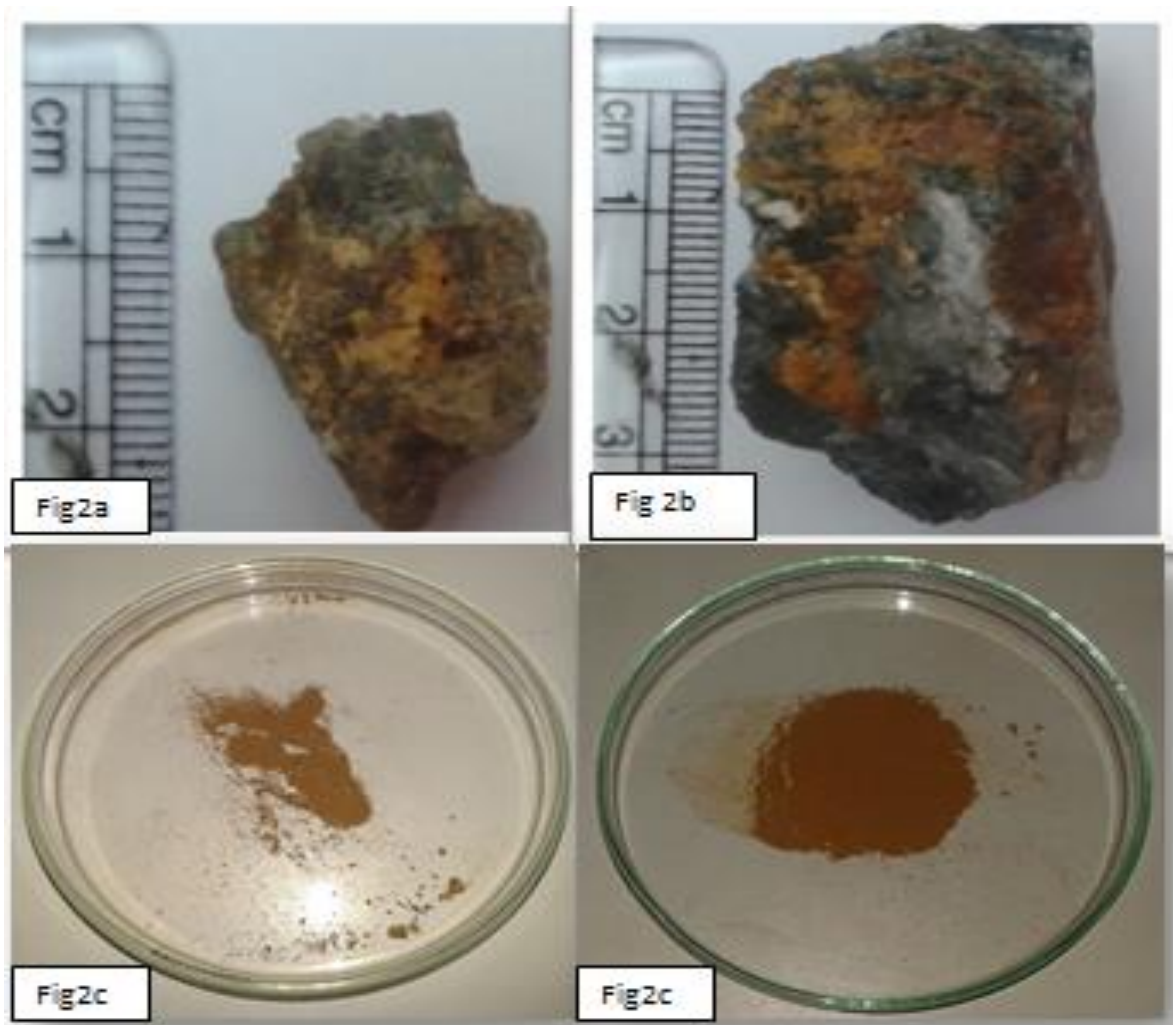

**Figure 2 (a-d): a, b- 65 and 60 meter deep core Lensoid tilloid samples. C, d- Powdered tilloid samples**

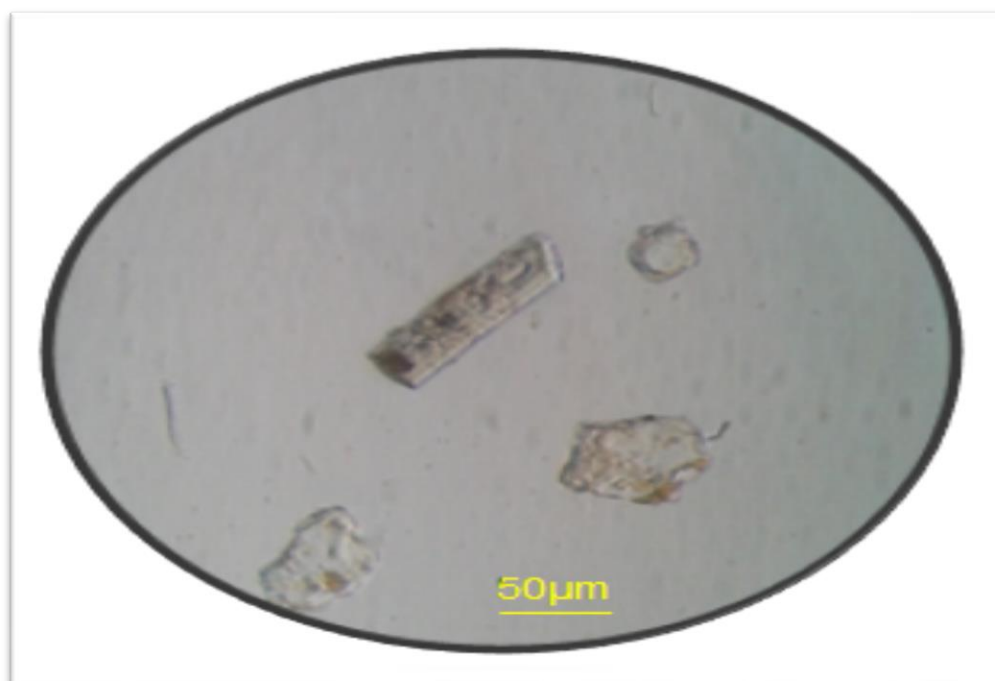

**Fig 3: Mixed field showing the Zircon and other minerals**

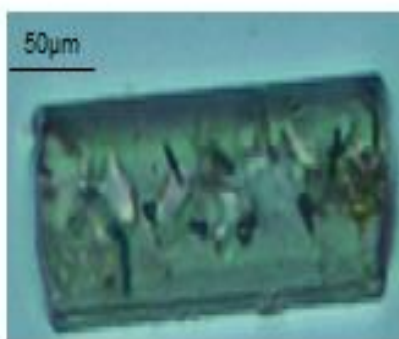

**Fig 4a**

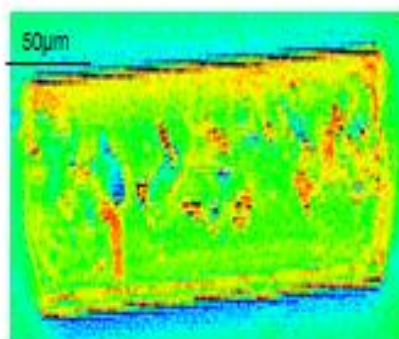

**Fig 4b**

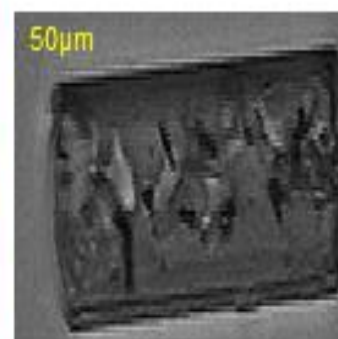

**Fig 4c**

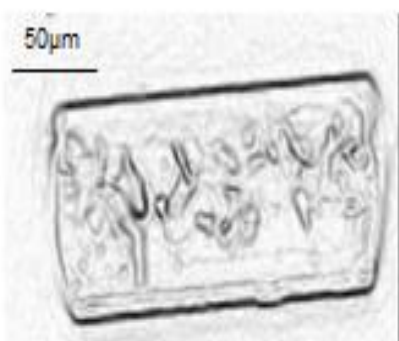

**Fig 4d**

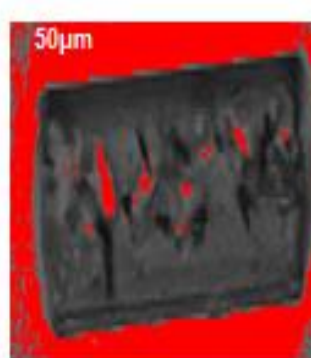

**Fig 4e**

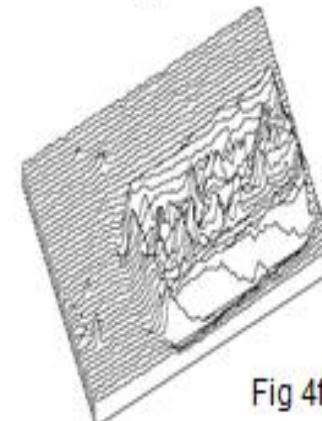

**Fig 4f**

**Fig 4(a-f): a-original Zircon, b- Pseudo, c -sharp edges of zircon, d-sharp edges of zircons, e-density slice, f -surface plot**

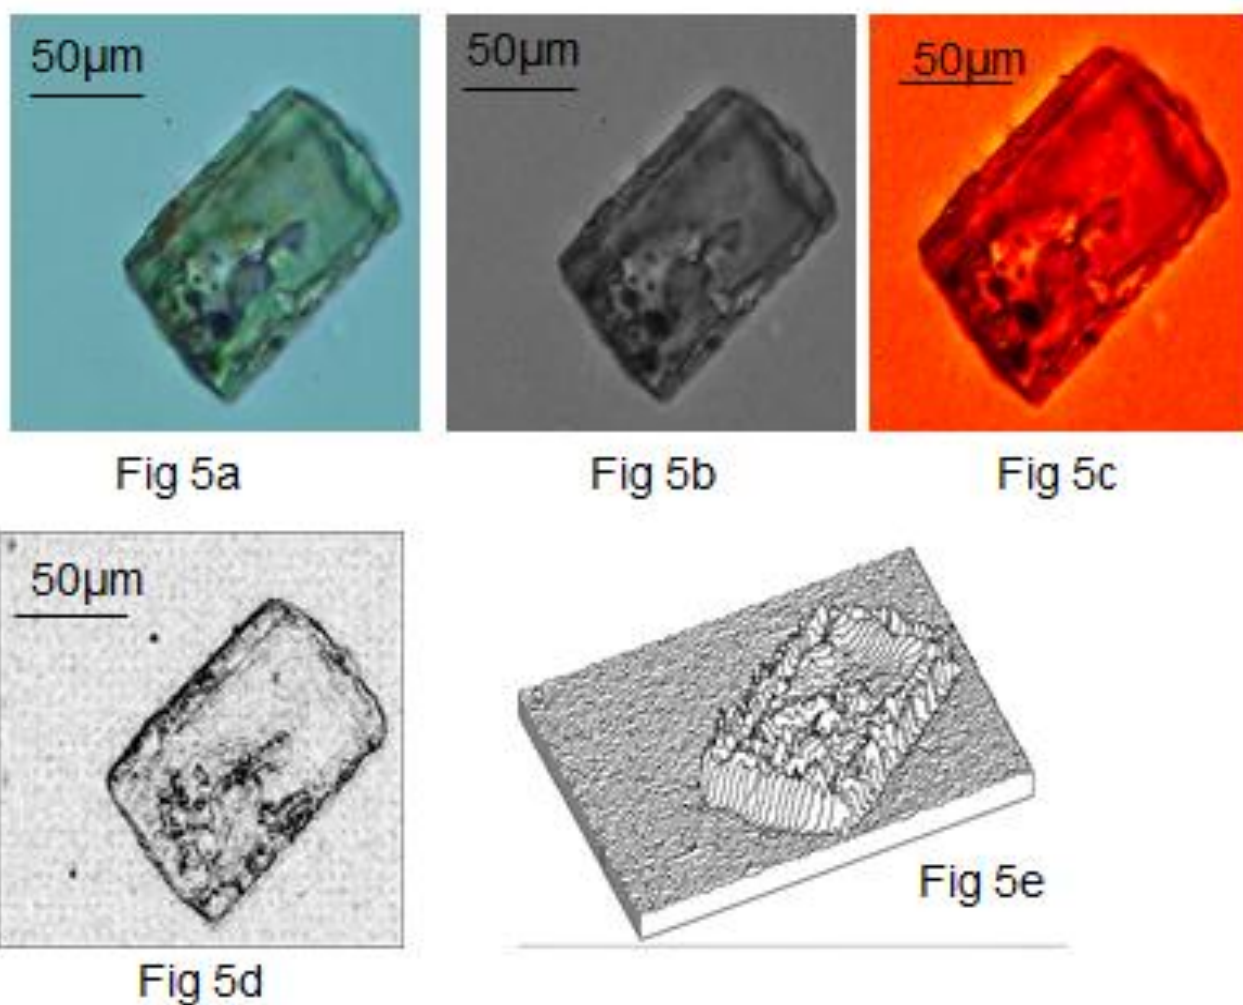

**Figure 5(a-e): a-original Zircon, b- sharp edges of zircon, c -Pseudo, d-sharp edges of zircons and e-surface plot**

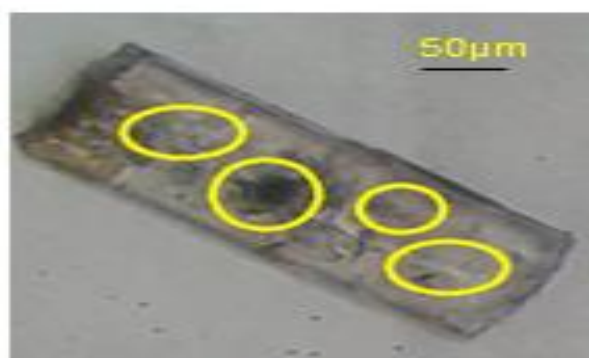

Fig 6a

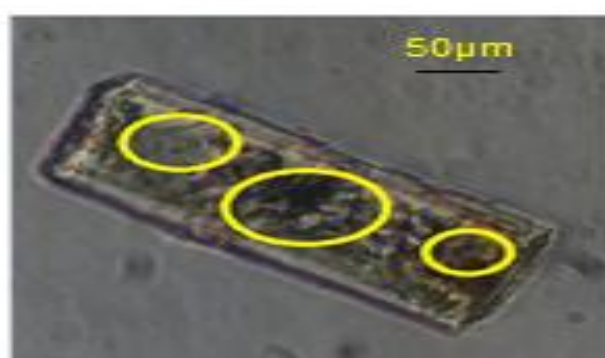

Fig 6b

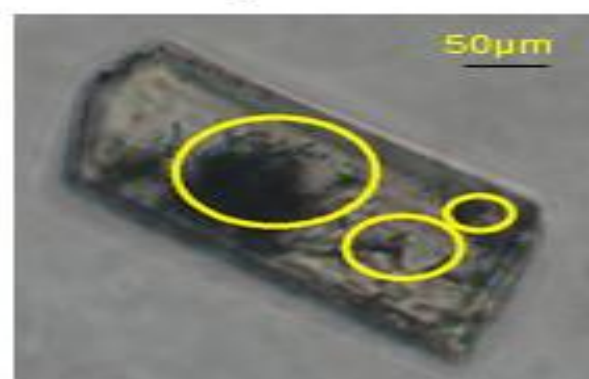

Fig 6c

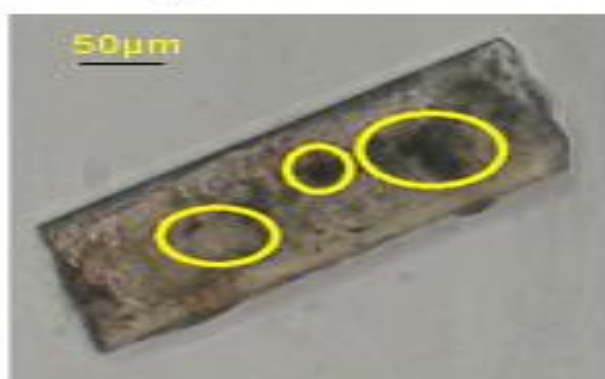

Fig 6d

**Fig6 (a-b): Yellow circles indicate presumptive bioinclusions**

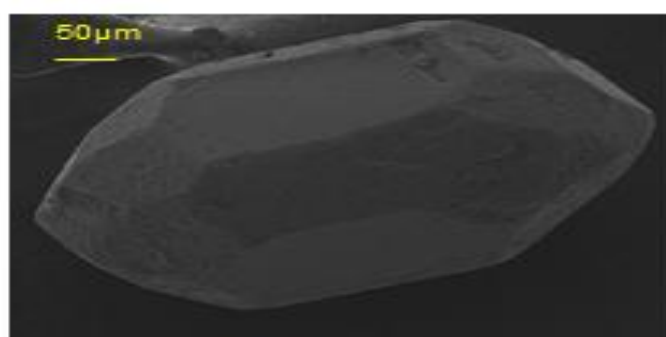

Fig 7a

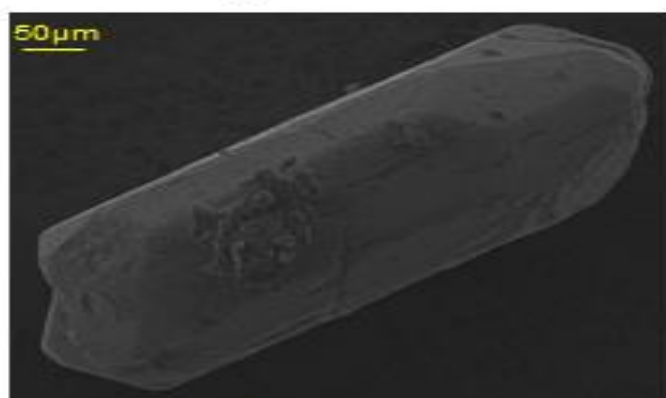

Fig 7b

**Figure 7 (a-b) : SEM typology of Zircon**
